# Supplementary material
Source: publisher site journal article supplement (https://www.dovepress.com/article/284720)

**SUPPLEMENTARY MATERIAL**

**S1 METHODS**

**Time-to-event model for exacerbation risk**

Time-to-event data were analyzed using a Cox proportional hazard model, characterized by a hazard function for subject *i*, , dependent on a baseline hazard function and the impact of *Q* baseline covariates (*Covli*), and a survival function, (in this work, *survival* refers to exacerbation-free probability):

(S1)

The survival function can be further compared with Kaplan-Meier (KM) estimates, directly from the data. The baseline hazard function was specified in the form of a piecewise-constant function. represent the hazard ratios (HR) for the instantaneous risk change, associated with a relative change in covariate value.

**Longitudinal model**

Longitudinal data (biomarkers) were analyzed using a linear mixed-effects (LME) model. A model, , was developed using spline functions with fixed and random effects, and a residual error was taken into account. For the *i*th subject, the time-dependent biomarker behavior can be expressed as follows:

(S2)

where X and Z are the design matrices, incorporating spline basis functions for fixed and random effects ( anb , respectively); and and are conditionally independent and normally distributed. Covariate impact can be assessed for fixed effects and random effects. In this work we tested covariates on fixed effects only. The knots for the spline basis function were distributed in a way that allowed at least two measurements per knot interval. Knots positions were defined using normalized time units calculated as days/142 (approximately half a year).

**Joint modeling of longitudinal and time-to-event data**

The association and impact of longitudinal FEV1 on the risk of exacerbation was analyzed using the joint modeling approach, whereby the longitudinal biomarker affects the hazard function, and the survival function is formulated as follows:

(S3)

where is the association parameter, a key metric for the biomarker impact on the risk of exacerbation. In the JM package, the survival function is calculated using numerical integration via pseudo-adaptive Gaussian quadrature rules. To jointly estimate model parameters, a log-likelihood (LL) objective function is developed, combining linear mixed effects modeling and time-to-event modeling, and calculated using hybrid Expectation-Minimization and quasi-Newton algorithms implemented in the JM package [1] in R [2].

**Updated joint model**

In the updated joint model, the hazard component is described by Equation (S3), and the longitudinal component of the model includes the covariate *formoterol* (yes/no):

(S4)

where N and M represent the numbers of, respectively, fixed (β) and random (b) effects knots for B-spline basis matrices, for natural cubic splines .

**Validation procedure: Implementation steps**

1) repeat the following M times:

- for each patient in validation dataset (N in total) generate individual survival curve using **surfitJM** function;
- based on random value from uniform distribution [0, 1] generate event time for each patient i (using individual survival curve from previous step);

2) for each simulation k, from 1 to M, build KMk curve based on values (i in 1:N) using **survfit** function

3) compute mean KM curve and CI from set of KMk curves (k in 1:M)

**Consistency of association parameter per treatment arm**

To investigate the consistency of the association parameter across treatment mechanisms, the joint model was re-estimated per treatment arm (and placebo) of each study. The longitudinal model included treatment as a covariate and the proportional hazards model included treatment, country and the association to longitudinal FEV1. This model was thus similar to the base joint model (table S2), with the exception that absolute FEV1 was analyzed.

**References**

1. Rizopoulos, D., JM: An R Package for the Joint Modelling of Longitudinal and Time-to-Event Data. Journal of Statistical Software 2010: **35**(9)
2. R Core Team, *R*: A language and environment for statistical computing. 2016, Vienna, Austria: R Foundation for Statistical Computing, Vienna, Austria. https://www.R-project.org/

**S2 RESULTS**

**TABLES**

**Table S1. Cox proportional hazard model output for Study A (from Table 3). Listing from RStudio**

n= 1740, number of events= 599

coef exp(coef) se(coef) z Pr(>|z|)

Denmark 0.0583 1.0600 0.1836 0.318 0.7507

Iceland 0.7363 2.0882 0.2650 2.778 0.0054 **

Germany -0.3729 0.6886 0.1487 2.508 0.0121 *

Greece 0.2820 1.3257 0.2369 1.190 0.2341

Hungary -0.3505 0.7043 0.1217 2.879 0.0039 **

Mexico -1.4937 0.2245 0.3217 -4.643 3.43e-06 ***

Romania -0.7748 0.4607 0.1899 -4.079 4.52e-05 ***

Bulgaria -0.3281 0.7203 0.1618 -2.027 0.0426 *

Formoterol 9 -0.1574 0.8543 0.1125 -1.399 0.1617

For/BUD 9/160 -0.3460 0.7075 0.1154 -2.998 0.0027 **

For/BUD 9/320 -0.4358 0.6467 0.1171 -3.721 0.0002 ***

FEV1_baseline -0.8513 0.4268 0.11793 -7.219 5.24e-13 ***

Signif. codes: 0 ‘***’ 0.001 ‘**’ 0.01 ‘*’ 0.05 ‘.’ 0.1 ‘ ’ 1

Concordance = 0.653 (se = 0.012 )

Rsquare = 0.089 (max possible = 0.993 )

Likelihood ratio test = 162.3 on 12 df, p = 0

Wald test = 150.1 on 12 df, p=0

Score (logrank) test = 158.8 on 12 df, p = 0

__________________________________________________

coef - coefficient, se - standard error, df - degrees of freedom, z - z-score, p - p-value

**Table S2. Base joint model output for Study A (from Table 3). Listing from RStudio**

**Data Descriptors:**

Longitudinal Process Event Process

Number of Observations: 8982 Number of Events: 599 (34.4%)

Number of Groups: 1740

**Joint Model Summary:**

Longitudinal Process: Linear mixed-effects model

Event Process: Relative risk model with piecewise-constant baseline risk function

Parameterization: Time-dependent

log.Lik AIC BIC

1733.369 -3382.738 -3153.349

**Variance Components:**

StdDev

(Intercept) 0.0000

ns(months, knots = c(0.401, 1.465))1 0.2341

ns(months, knots = c(0.401, 1.465))2 0.5093

ns(months, knots = c(0.401, 1.465))3 0.2289

Residual 0.1232

Coefficients:

**Longitudinal Process**

Value Std.Err z-value p-value

(Intercept) 0.0016 0.0029 0.5325 0.5944

ns(months, knots = c(0.197, 0.568, 1.465))1 0.0262 0.0256 1.0208 0.3073

ns(months, knots = c(0.197, 0.568, 1.465))2 0.0074 0.0220 0.3367 0.7364

ns(months, knots = c(0.197, 0.568, 1.465))3 0.0083 0.0228 0.3653 0.7149

ns(months, knots = c(0.197, 0.568, 1.465))4 -0.0147 0.0231 -0.6374 0.5239

ns(months, knots = c(0.197, 0.568, 1.465))1:Formoterol 9 0.0171 0.0348 0.4918 0.6229

ns(months, knots = c(0.197, 0.568, 1.465))2:Formoterol 9 0.0261 0.0296 0.8824 0.3776

ns(months, knots = c(0.197, 0.568, 1.465))3:Formoterol 9 0.1646 0.0297 5.5384 <0.0001

ns(months, knots = c(0.197, 0.568, 1.465))4:Formoterol 9 0.0479 0.0311 1.5388 0.1238

ns(months, knots = c(0.197, 0.568, 1.465))1:For/BUD 9/160 0.0254 0.0342 0.7447 0.4564

ns(months, knots = c(0.197, 0.568, 1.465))2:For/BUD 9/160 0.0658 0.0290 2.2681 0.0233

ns(months, knots = c(0.197, 0.568, 1.465))3:For/BUD 9/160 0.1706 0.0292 5.8404 <0.0001

ns(months, knots = c(0.197, 0.568, 1.465))4:For/BUD 9/160 -0.0166 0.0305 -0.5430 0.5871

ns(months, knots = c(0.197, 0.568, 1.465))1:For/BUD 9/320 0.0801 0.0340 2.3563 0.0185

ns(months, knots = c(0.197, 0.568, 1.465))2:For/BUD 9/320 0.0309 0.0290 1.0665 0.2862

ns(months, knots = c(0.197, 0.568, 1.465))3:For/BUD 9/320 0.2105 0.0292 7.2170 <0.0001

ns(months, knots = c(0.197, 0.568, 1.465))4:For/BUD 9/320 0.0390 0.0304 1.2813 0.2001

**Event Process**

Value Std.Err z-value p-value

Formoterol 9 -0.1134 0.1133 -1.0005 0.3171

For/BUD 9/160 -0.2757 0.1171 -2.3541 0.0186

For/BUD 9/320 -0.3654 0.1189 -3.0732 0.0021

Denmark 0.0244 0.1841 0.1326 0.8945

Iceland 0.7330 0.2655 2.7610 0.0058

Germany -0.3734 0.1488 -2.5085 0.0121

Greece 0.2169 0.2378 0.9120 0.3618

Hungary -0.3501 0.1220 -2.8690 0.0041

Mexico -1.3830 0.3227 -4.2853 <0.0001

Romania -0.7862 0.1902 -4.1345 <0.0001

Bulgaria -0.3520 0.1622 -2.1708 0.0299

FEV1_baseline -0.8917 0.1184 -7.5286 <0.0001

Delta_FEV1 -0.9991 0.2865 -3.4866 0.0005

Integration:

method: (pseudo) adaptive Gauss-Hermite

quadrature points: 3

**Table S3. Updated joint model output for Study A (from Table 4). Listing from RStudio**

**Data Descriptors:**

Longitudinal Process Event Process

Number of Observations: 8982 Number of Events: 599 (34.4%)

Number of IDs: 1740

**Joint Model Summary:**

Longitudinal Process: Linear mixed-effects model

Event Process: Relative risk model with piecewise-constant baseline risk function

log.Lik AIC BIC

-853.4 1772.8 1953.0

**Variance Components:**

StdDev

(Intercept) 0.397

ns(months, knots = c(0.401, 1.465))1 0.2040

ns(months, knots = c(0.401, 1.465))2 0.3502

ns(months, knots = c(0.401, 1.465))3 0.1920

Residual 0.1398

Coefficients:

**Longitudinal Process**

Value Std.Err z-value p-value

(Intercept) 1.0508 0.0101 104.2922 <0.0001

ns(months, knots = c(0.197, 0.568, 1.465))1 0.0361 0.0224 1.6083 0.1078

ns(months, knots = c(0.197, 0.568, 1.465))2 0.0152 0.0229 0.6625 0.5076

ns(months, knots = c(0.197, 0.568, 1.465))3 0.0276 0.0238 1.1567 0.2474

ns(months, knots = c(0.197, 0.568, 1.465))4 -0.0119 0.0227 -0.5261 0.5988

ns(months, knots = c(0.197, 0.568, 1.465))1:formyes 0.0345 0.0253 1.3646 0.1724

ns(months, knots = c(0.197, 0.568, 1.465))2:formyes 0.0344 0.0257 1.3357 0.1817

ns(months, knots = c(0.197, 0.568, 1.465))3:formyes 0.1622 0.0267 6.0733 <0.0001

ns(months, knots = c(0.197, 0.568, 1.465))4:formyes 0.0233 0.0254 0.9151 0.3602

**Event Process**

Value Std.Err z-value p-value

dosedep -0.1669 0.0505 -3.3036 0.0010

breathsc 0.1790 0.0641 2.7927 0.0052

XDPNO 0.1269 0.0335 3.7844 0.0002

Denmark 0.0678 0.1846 0.3676 0.7132

Iceland 0.9572 0.2718 3.5220 0.0004

Germany -0.3260 0.1486 -2.1930 0.0283

Greece 0.2883 0.2405 1.1987 0.2306

Hungary -0.2881 0.1228 -2.3463 0.0190

Mexico -1.4284 0.3222 -4.4337 <0.0001

Romania -0.9731 0.1975 -4.9269 <0.0001

Bulgaria -0.3197 0.1614 -1.9806 0.0476

FEV1 Assoct -0.8240 0.1163 -7.0845 <0.0001

Integration method: (pseudo) adaptive Gauss-Hermite

quadrature points: 3

**Table S4. Update joint model output, re-estimation for Study B. Listing from RStudio**

**Data Descriptors:**

Longitudinal Process Event Process

Number of Observations: 6630 Number of Events: 396 (24.7%)

Number of Groups: 1604

**Joint Model Summary:**

Longitudinal Process: Linear mixed-effects model

Event Process: Relative risk model with piecewise-constant

baseline risk function

Parameterization: Time-dependent

log.Lik AIC BIC

-524.3422 1100.684 1240.571

**Variance Components:**

StdDev

(Intercept) 0.3867

ns(months, knots = c(0.401408450704225))1 0.2676

ns(months, knots = c(0.401408450704225))2 0.1358

Residual 0.1416

Coefficients:

**Longitudinal Process**

Value Std.Err z-value p-value

(Intercept) 1.0549 0.0103 102.7464 <0.0001

ns(months, knots = c(0.197, 0.568))1 -0.0210 0.0188 -1.1145 0.2651

ns(months, knots = c(0.197, 0.568))2 0.0234 0.0187 1.2500 0.2113

ns(months, knots = c(0.197, 0.568))3 0.0124 0.0148 0.8416 0.4000

ns(months, knots = c(0.197, 0.568))1:formyesyes 0.0275 0.0227 1.2132 0.2251

ns(months, knots = c(0.197, 0.568))2:formyesyes 0.1203 0.0224 5.3734 <0.0001

ns(months, knots = c(0.197, 0.568))3:formyesyes 0.0002 0.0179 0.0088 0.9930

**Event Process**

Value Std.Err z-value p-value

dosedep -0.1336 0.0563 -2.3715 0.0177

breathsc 0.2202 0.0772 2.8512 0.0044

XDPNO 0.2668 0.0388 6.8788 <0.0001

Czech Republic -0.5189 0.1811 -2.8660 0.0042

Netherlands 1.1135 0.1675 6.6492 <0.0001

Poland -0.2156 0.1274 -1.6921 0.0906

South Afric 0.1866 0.1769 1.0553 0.2913

FEV1 Assoct -0.9201 0.1561 -5.8927 <0.0001

Integration:

method: (pseudo) adaptive Gauss-Hermite

quadrature points: 3

**Table S5. Updated joint model output, re-estimation for Study C. Listing from RStudio**

**Data Descriptors:**

Longitudinal Process Event Process

Number of Observations: 4785 Number of Events: 458 (44%)

Number of Groups: 1042

**Joint Model Summary:**

Longitudinal Process: Linear mixed-effects model

Event Process: Relative risk model with piecewise-constant

baseline risk function

Parameterization: Time-dependent

log.Lik AIC BIC

-460.7483 979.4967 1123.015

**Variance Components:**

StdDev

(Intercept) 0.4058

ns(months, knots = c(0.401408450704225, 1.465))1 0.2227

ns(months, knots = c(0.401408450704225, 1.465))2 0.3266

ns(months, knots = c(0.401408450704225, 1.465))3 0.1189

Residual 0.1287

Coefficients:

**Longitudinal Process**

Value Std.Err z-value p-value

(Intercept) 1.0130 0.0132 76.8845 <0.0001

ns(months, knots = c(0.197, 0.568, 1.465))1 0.0728 0.0129 5.6353 <0.0001

ns(months, knots = c(0.197, 0.568, 1.465))2 0.0689 0.0149 4.6188 <0.0001

ns(months, knots = c(0.197, 0.568, 1.465))3 0.1769 0.0148 11.9489 <0.0001

ns(months, knots = c(0.197, 0.568, 1.465))4 -0.0029 0.0187 -0.1529 0.8785

**Event Process**

Value Std.Err z-value p-value

dosedep -0.1072 0.0577 -1.8593 0.0630

breathsc 0.3393 0.0631 5.3745 <0.0001

exachistory 0.1338 0.0379 3.5295 0.0004

Argentina 0.1269 0.1371 0.9260 0.3545

Brazil 0.2571 0.1818 1.4140 0.1573

South Aftrica 0.5752 0.1284 4.4808 <0.0001

Chile 0.1209 0.2291 0.5275 0.5978

Columbia -0.1235 0.3877 -0.3185 0.7501

Mexico 0.0274 0.2148 0.1275 0.8986

Peru -0.1675 0.4189 -0.3998 0.6893

Venezuela 0.3414 0.7116 0.4799 0.6313

FEV1 Assoct -0.9178 0.1291 -7.1097 <0.0001

Integration:

method: (pseudo) adaptive Gauss-Hermite

quadrature points: 3

**FIGURES**

**Figure S1.** Additional diagnostics of the updated joint model fitted to Study A. **A** Mean population predictions of FEV1 (top) and change from baseline FEV1 (bottom) with 95% CI (solid colored lines and shaded areas) with means of the original data (stars) vs. time. **B** Residuals of the longitudinal model vs. time based on individual (top) and population prediction (bottom)

**A**


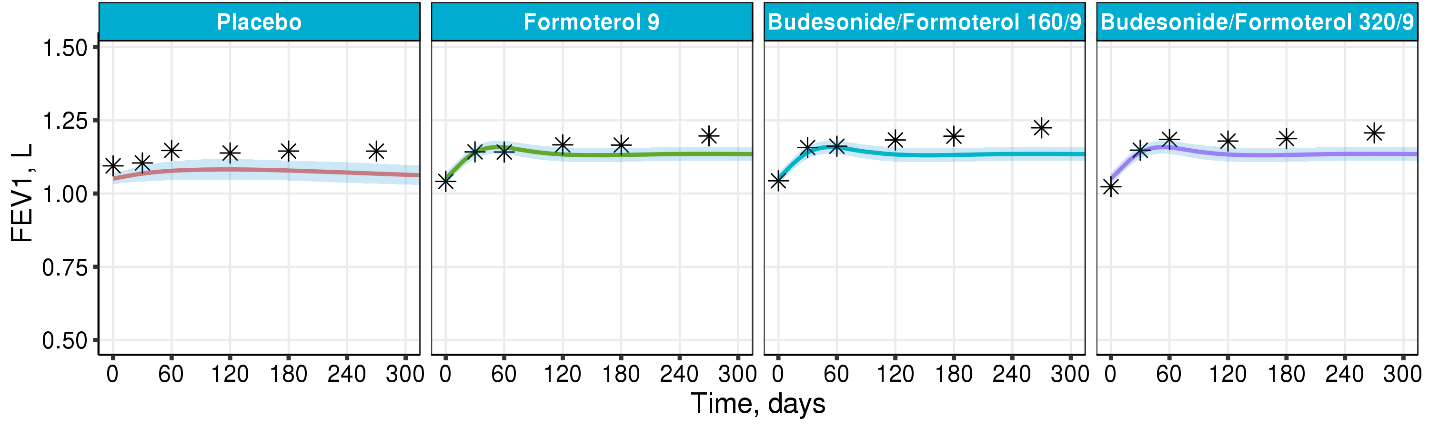


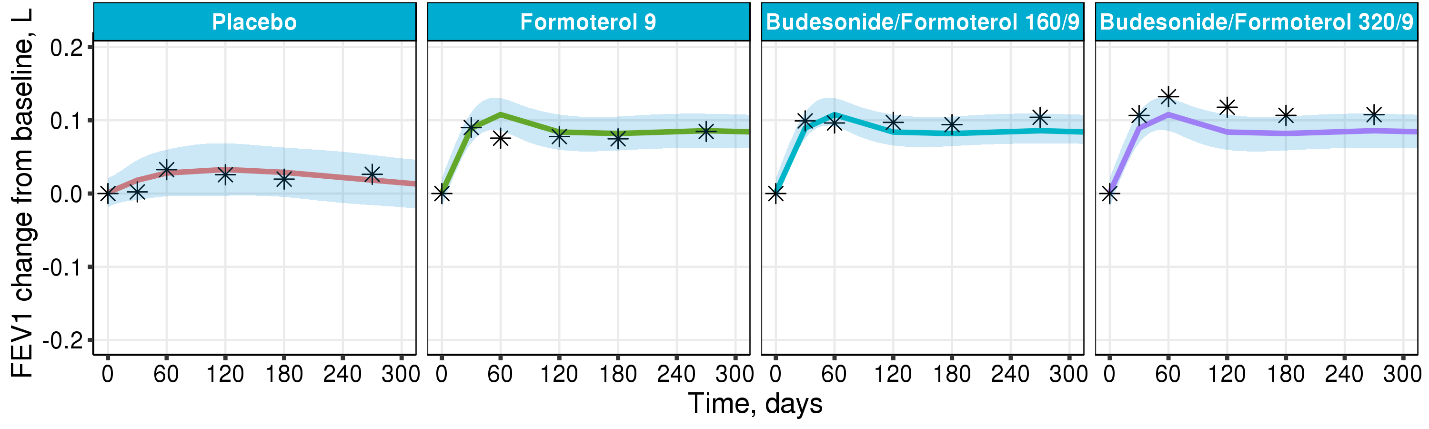


**B**


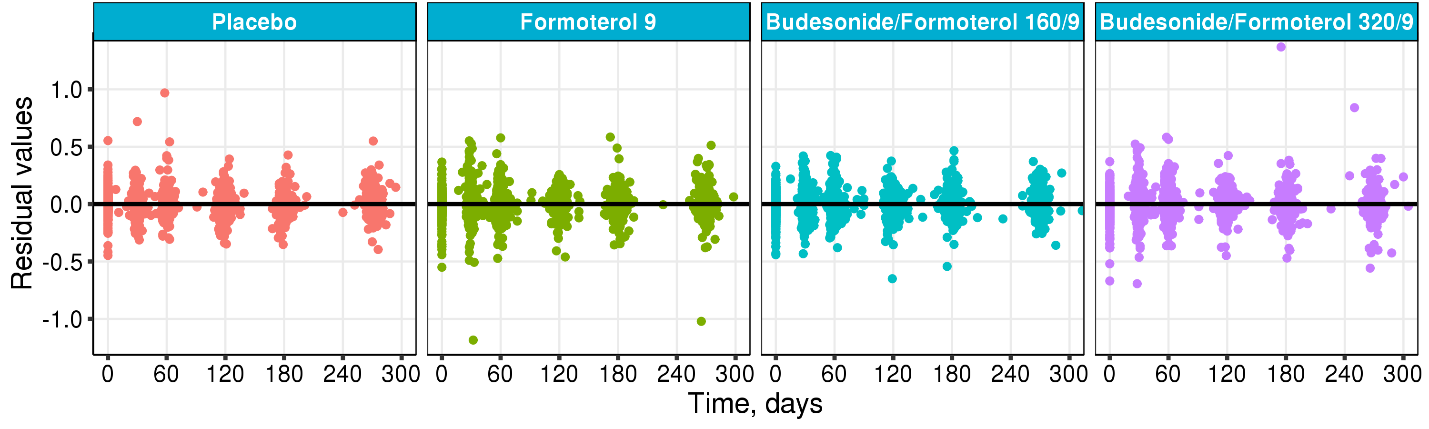


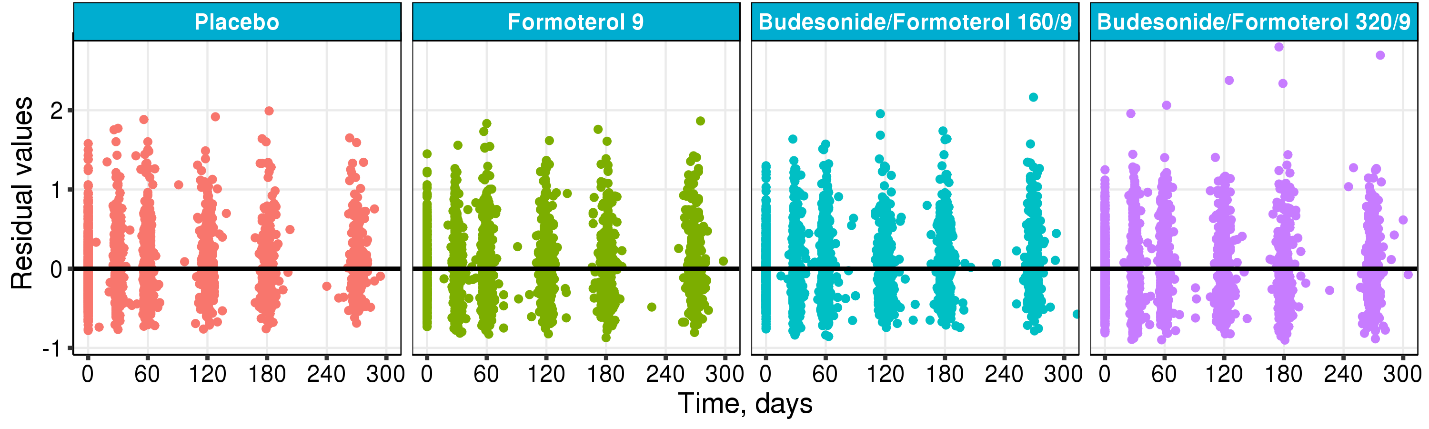


**Figure S2.** Diagnostics of the updated joint model re-estimated on Study B data.
Individual (**A**, top) and population (**A**, bottom) predictions of absolute FEV1, individual (**B**, top) and population (**B**, bottom) change from baseline FEV1, mean with 95% CI (solid colored lines and shaded areas) and mean of original data (stars) vs. time. Residuals vs time based on individual (**C**, top) and population (**C**, bottom) predictions. Predicted exacerbation-free probabilities (**D**), mean (solid line) with interquartile range (shaded area) and Kaplan-Meier estimates (dashed line)

**A**
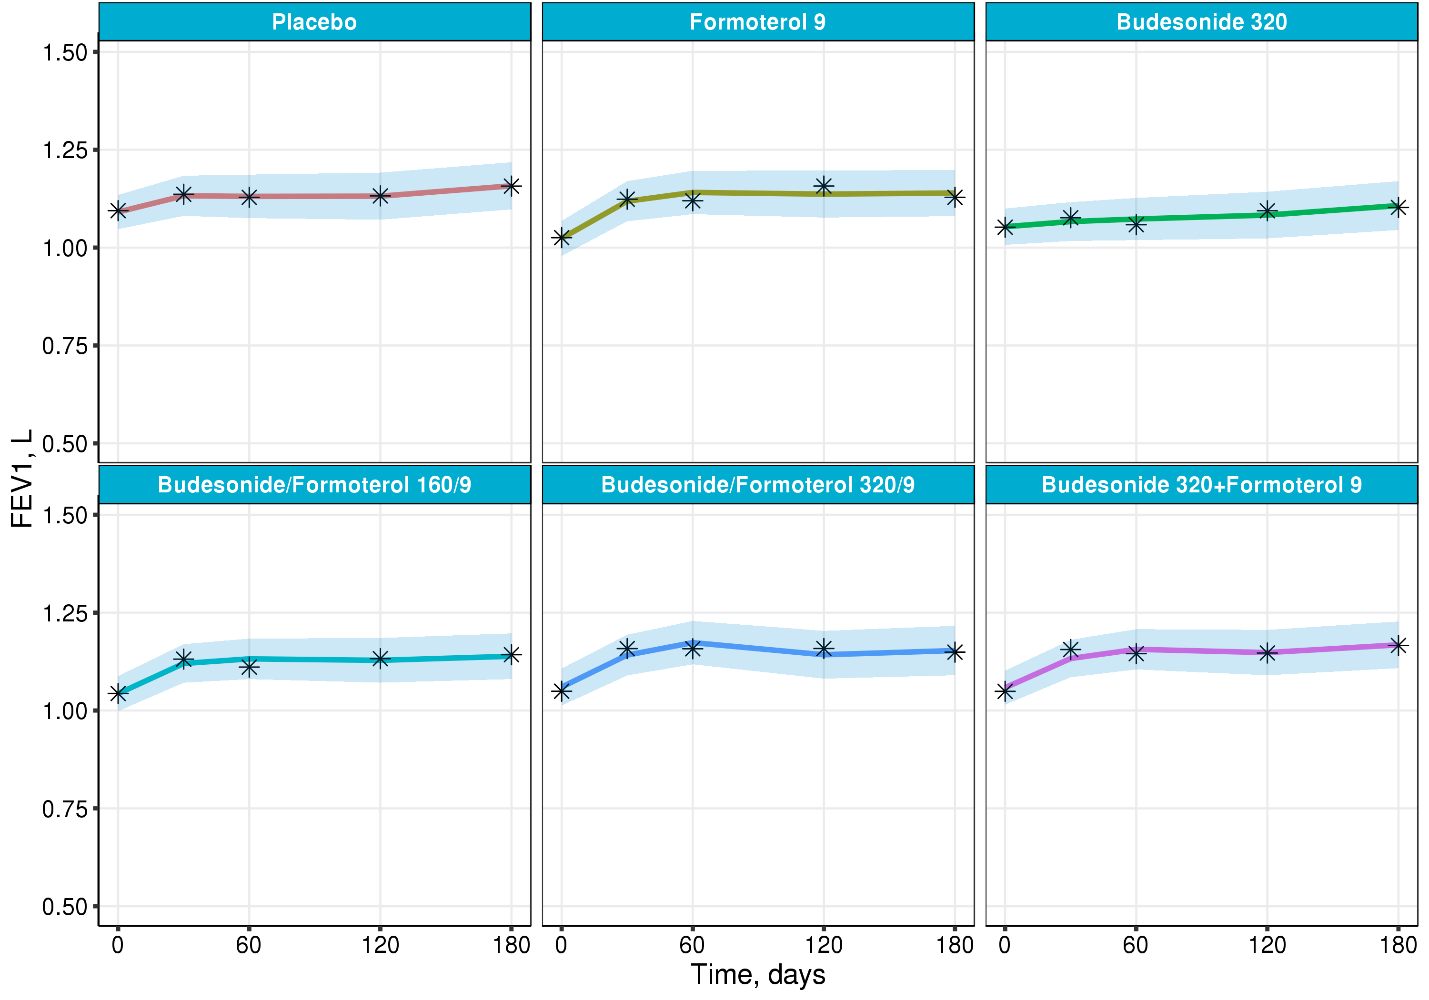

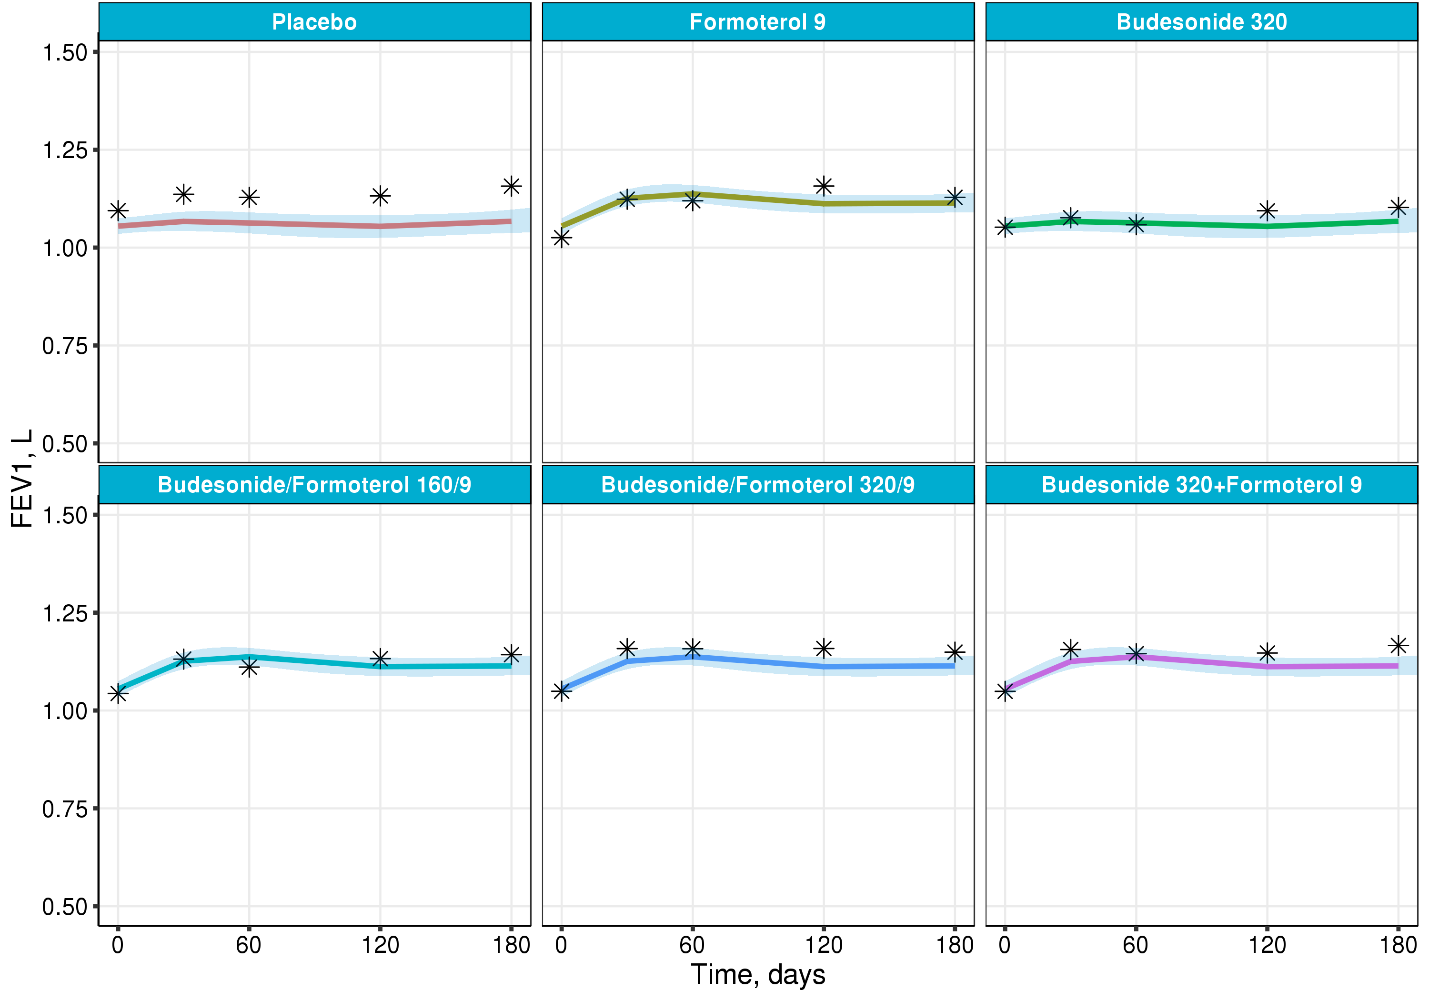


**B**


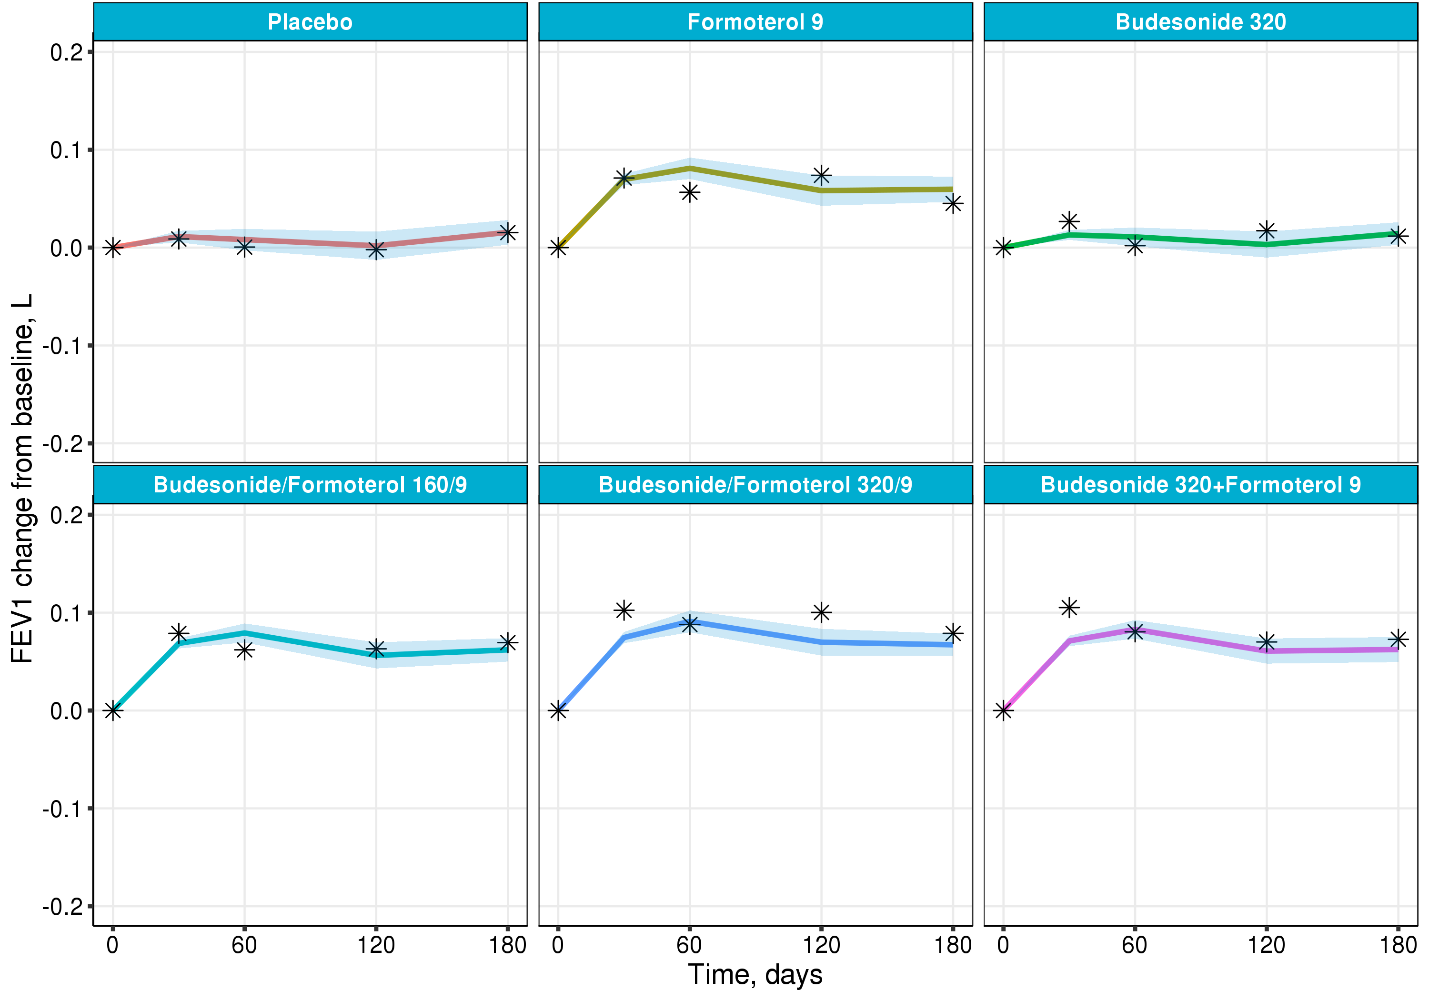


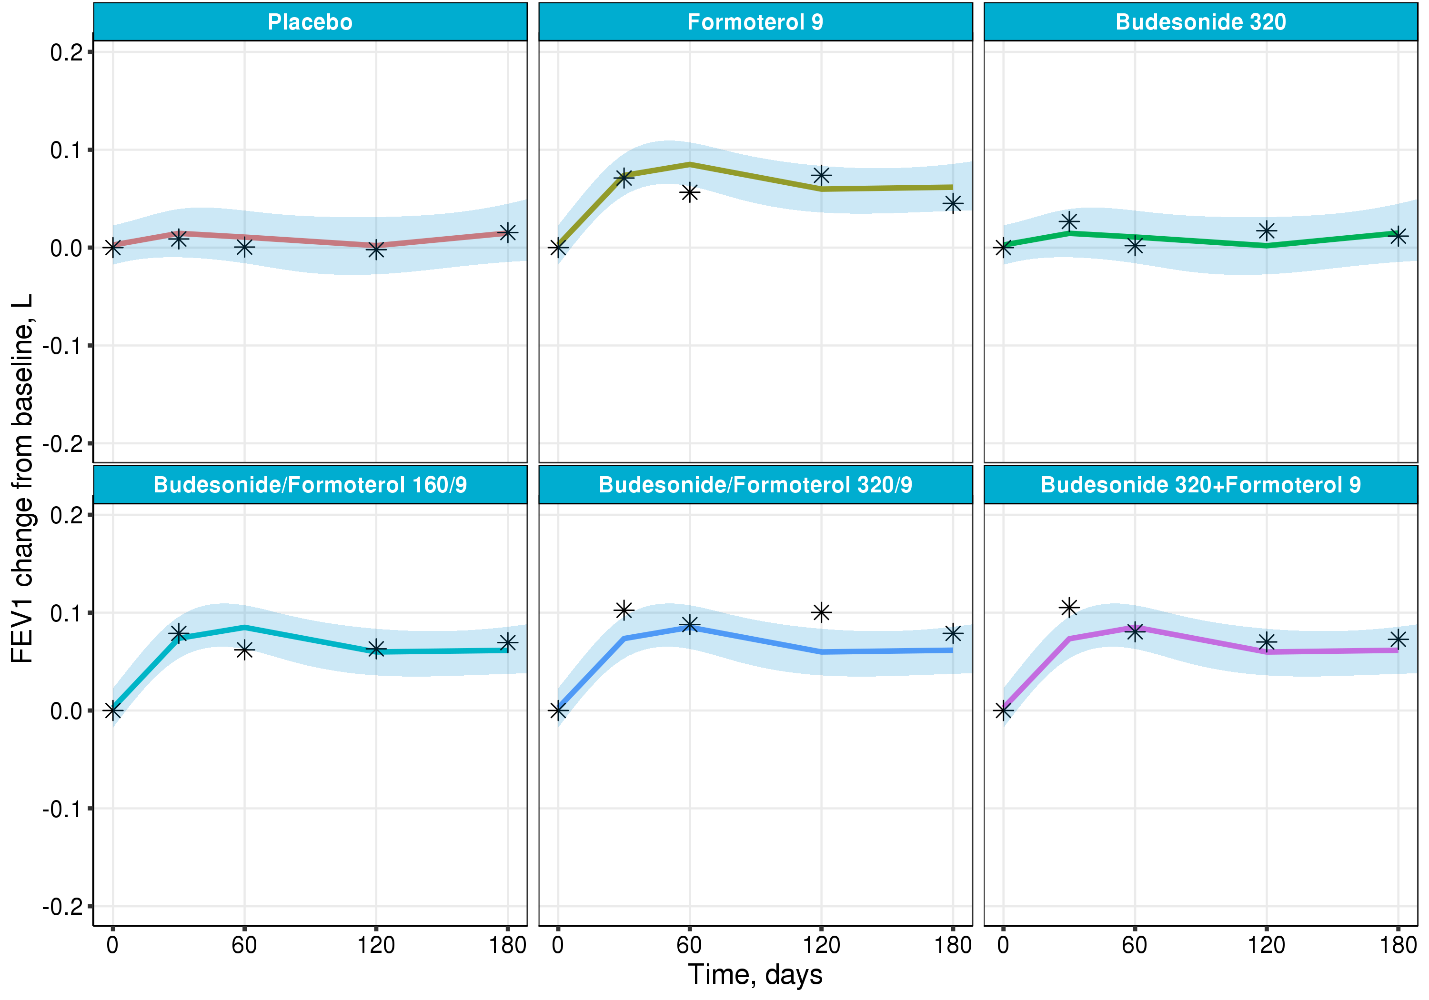


**C**


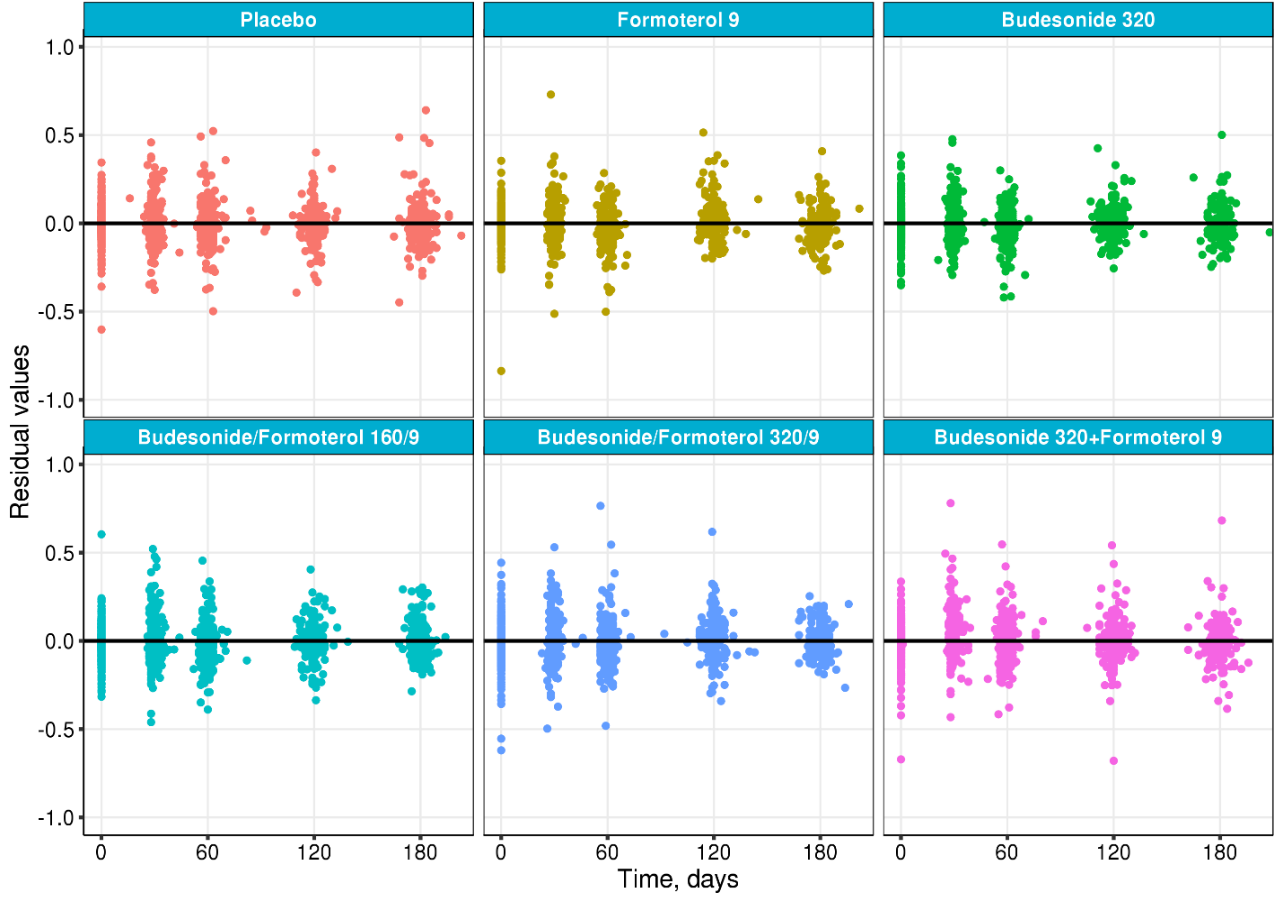


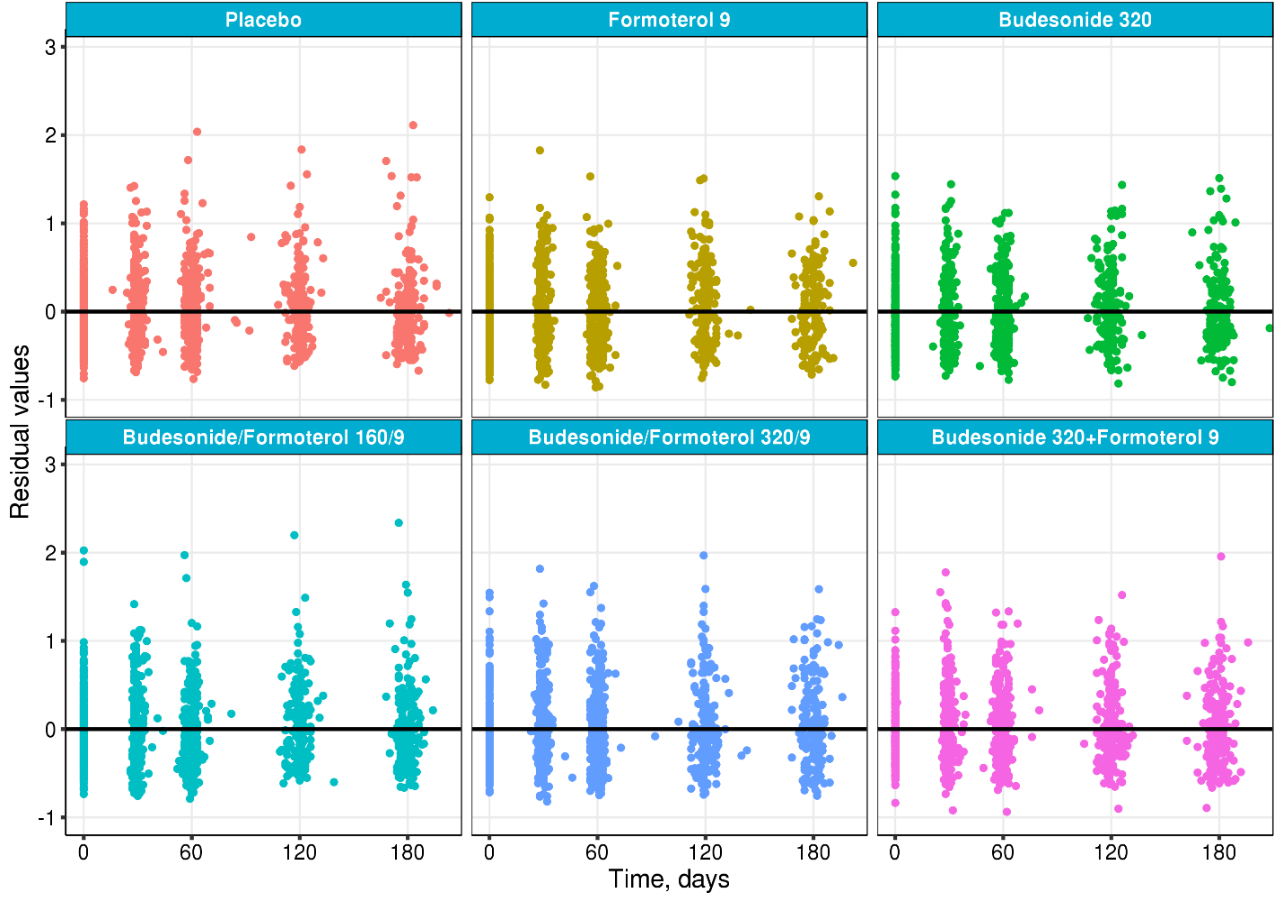


**D**


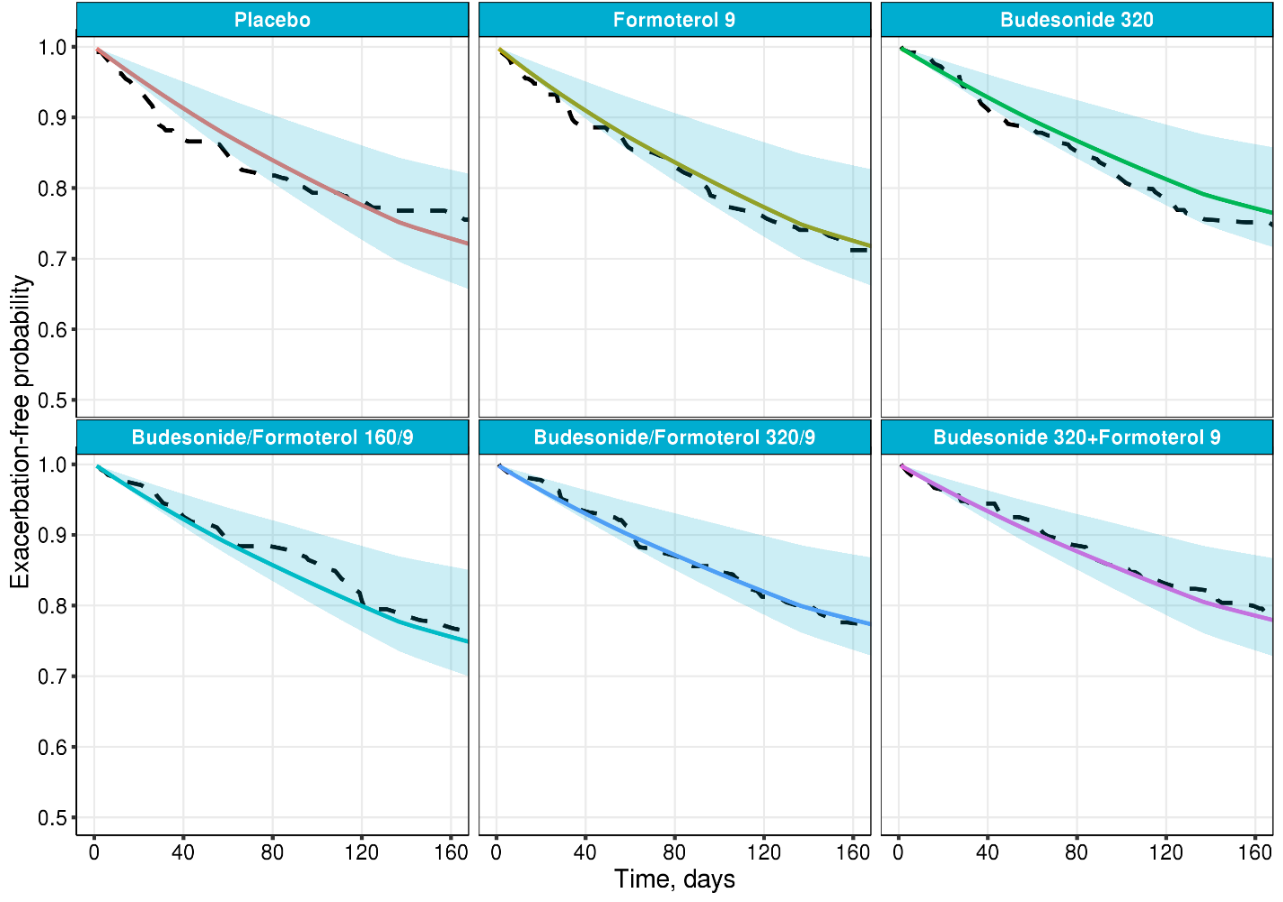


**Figure S3.** Diagnostics of the updated joint model fitted to Study C. Individual (**A**, top) and population (**A**, bottom) predictions of absolute FEV1, individual (**B**, top) and population (**B**, bottom) change from baseline FEV1, mean with 95% CI (solid colored lines and shaded areas) and mean of original data (stars) vs. time. Residuals vs time based on individual (**C**, top) and population (**C**, bottom) predictions. Predicted exacerbation-free probabilities (**D**), mean (solid line) with interquartile range (shaded area) and Kaplan-Meier estimates (dashed line)

**A**


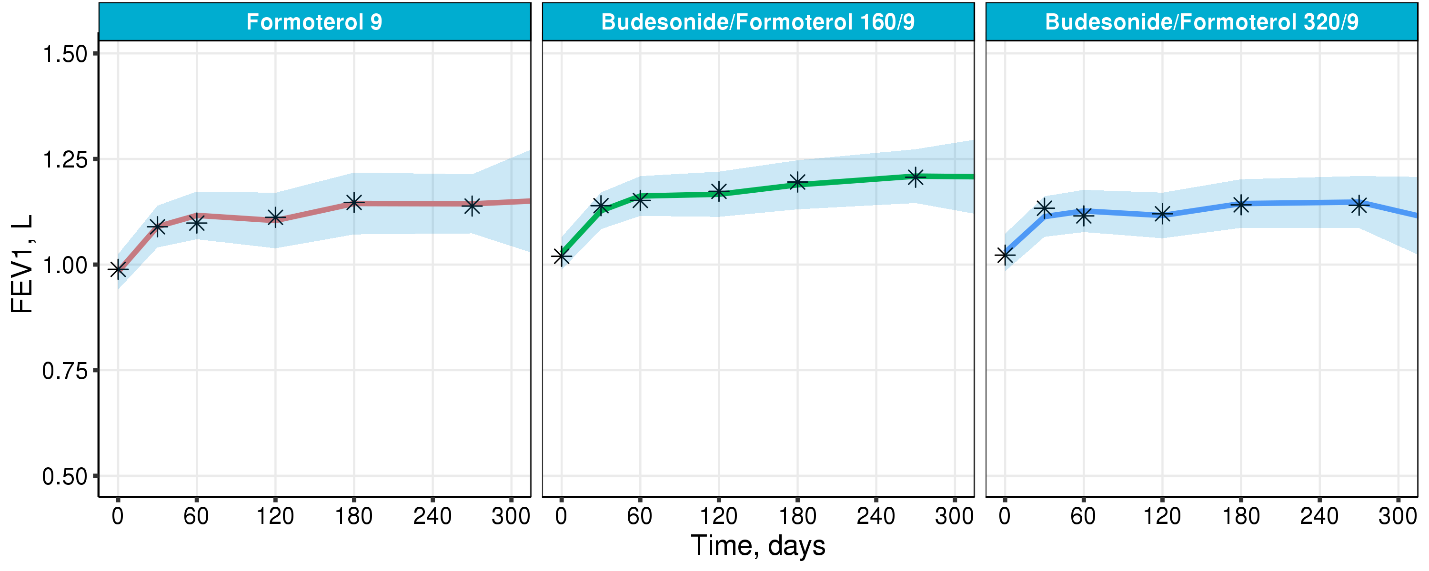


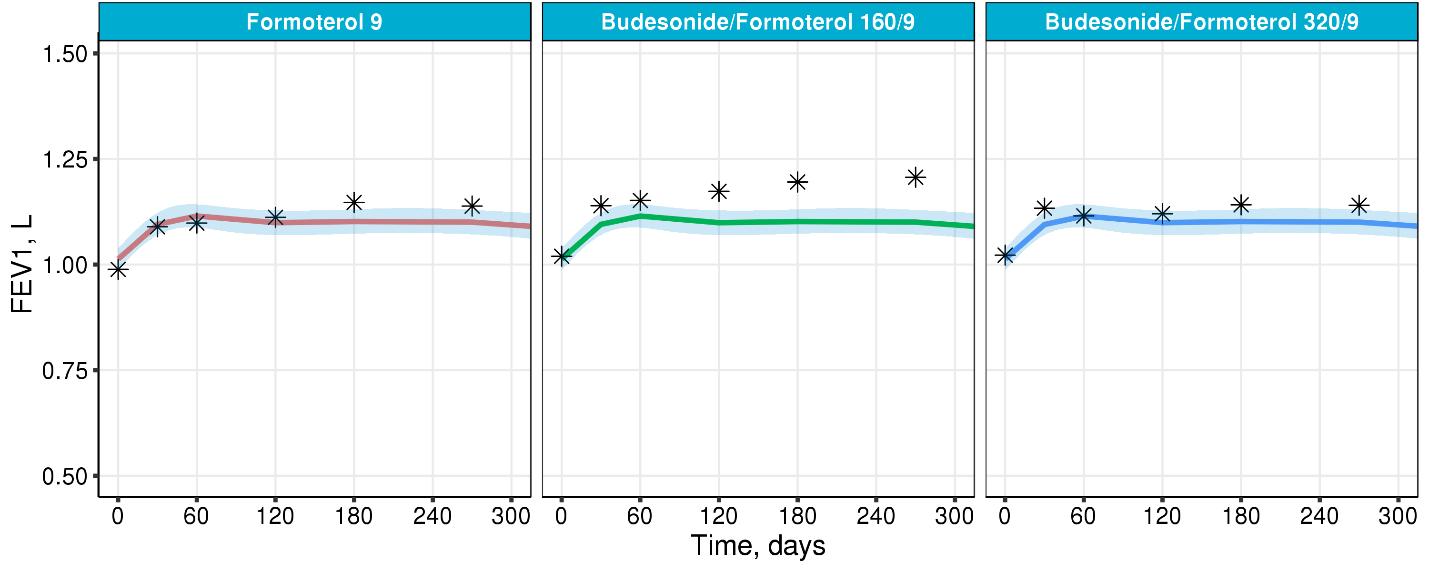


**B**


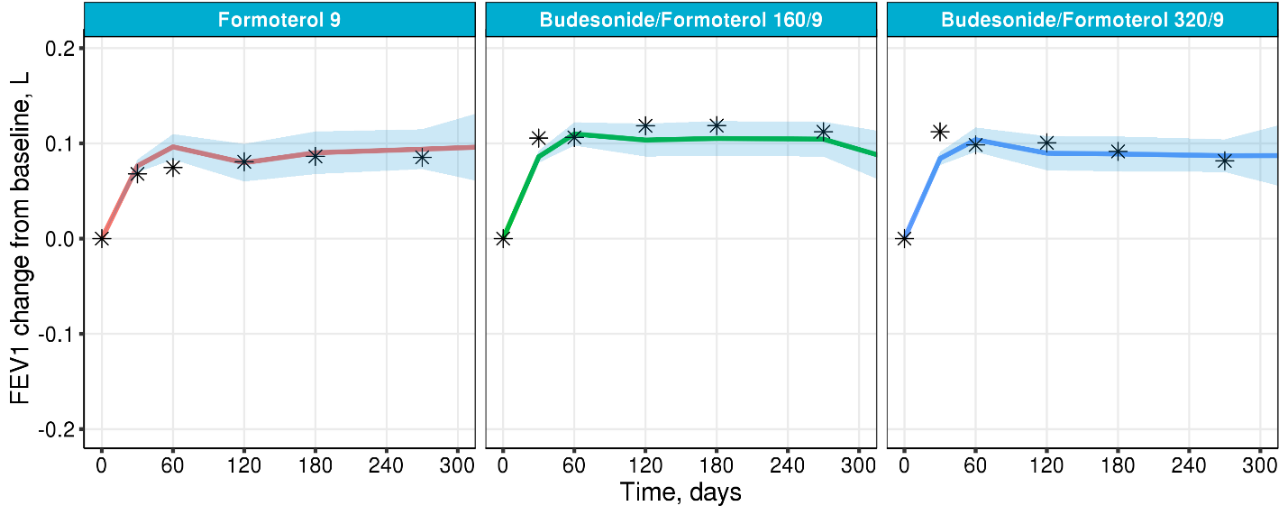


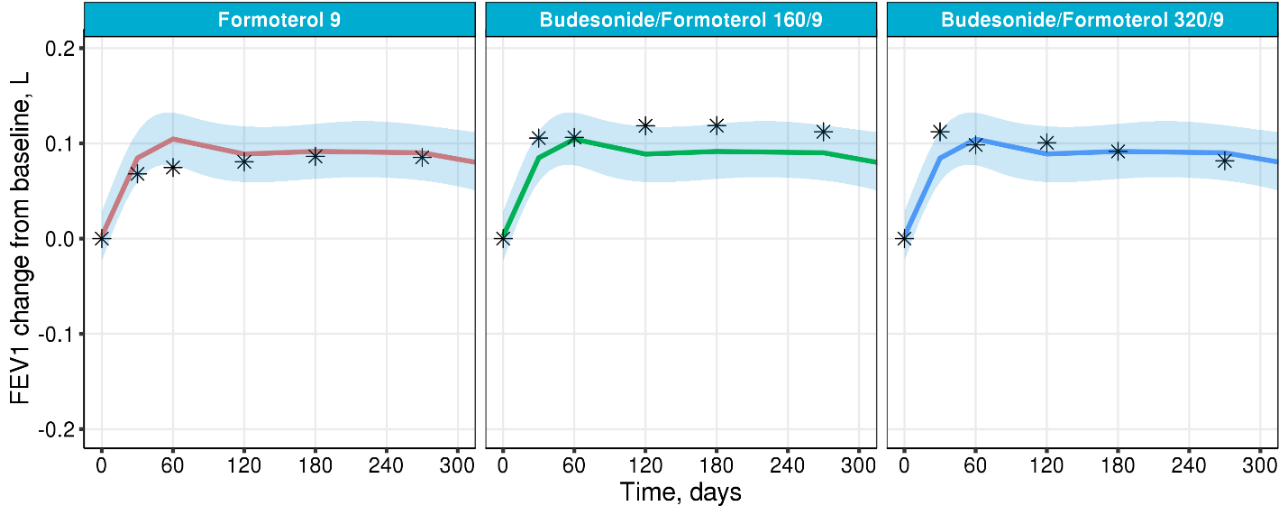


**C**


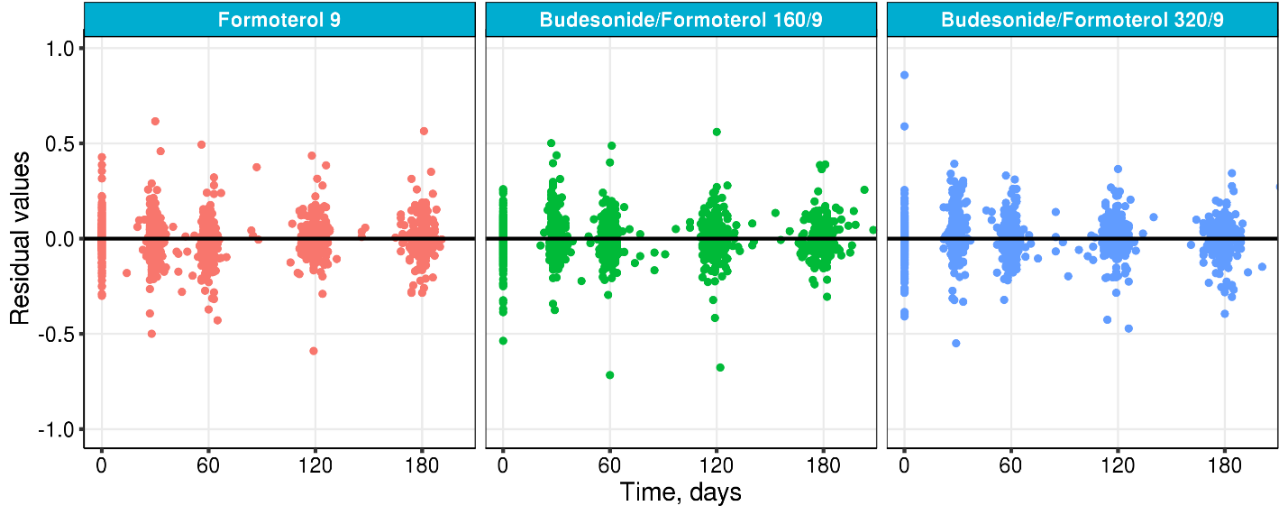

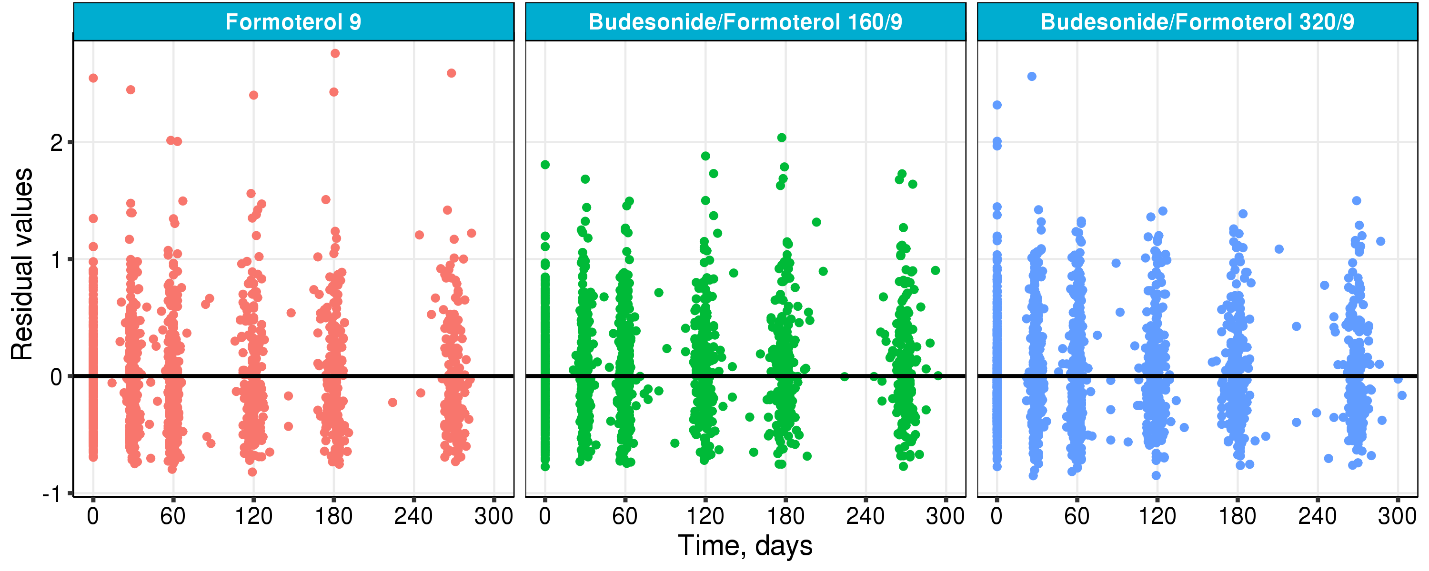


**D**


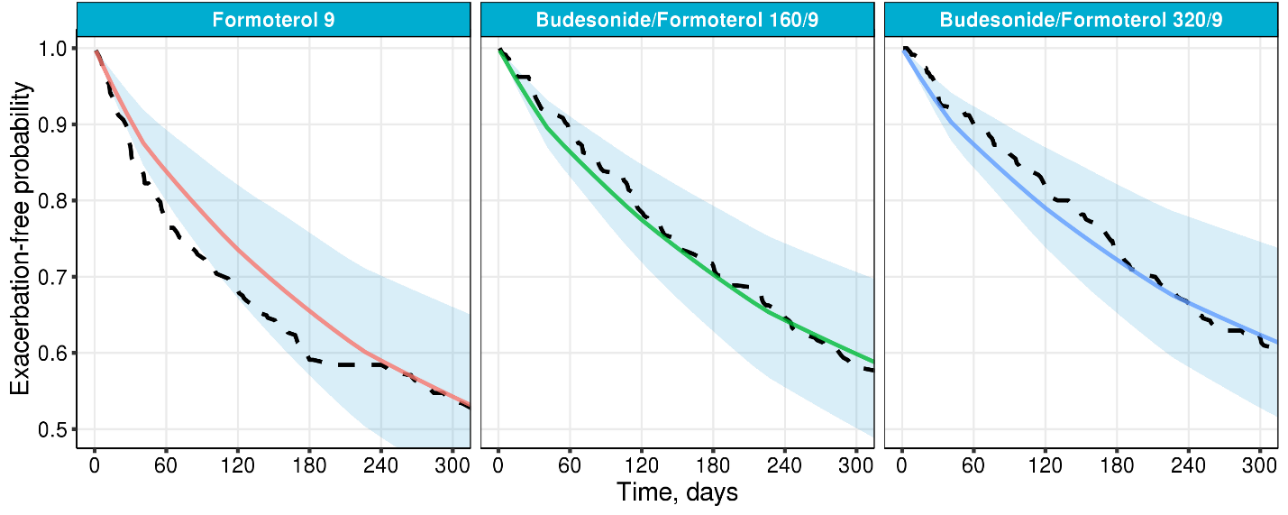

Supplement: Supplementary file 1 [file get_supplementary_file.php]
